# Supplementary material
Source: PubMed Central journal article supplement (PMC11304687)
Supplement: aac.00127-24-s0001.pdf [file aac.00127-24-s0001.pdf]

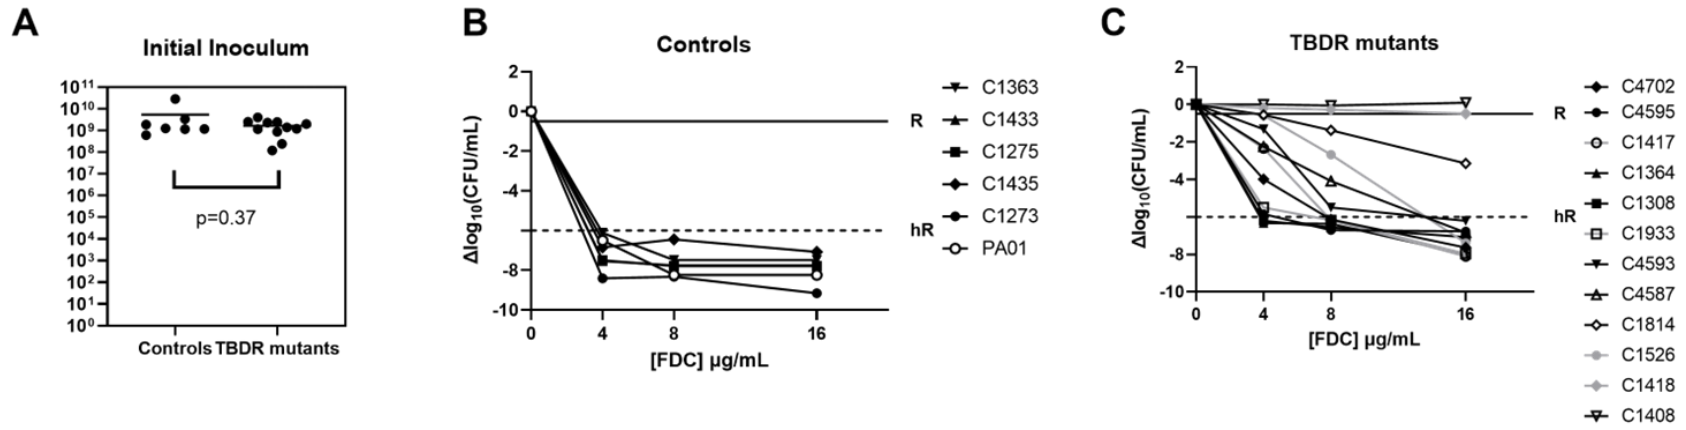

**Supplemental Figure 1. Initial isolate screening on agar dilution PAP-AUC after overnight growth in iron-depleted Mueller Hinton. A) Initial inoculum of isolates. B) Control isolates change in colony counts (CFU) from initial inoculum across cefiderocol (FDC) concentrations. C) TBDR mutants change in CFU from initial inoculum.**

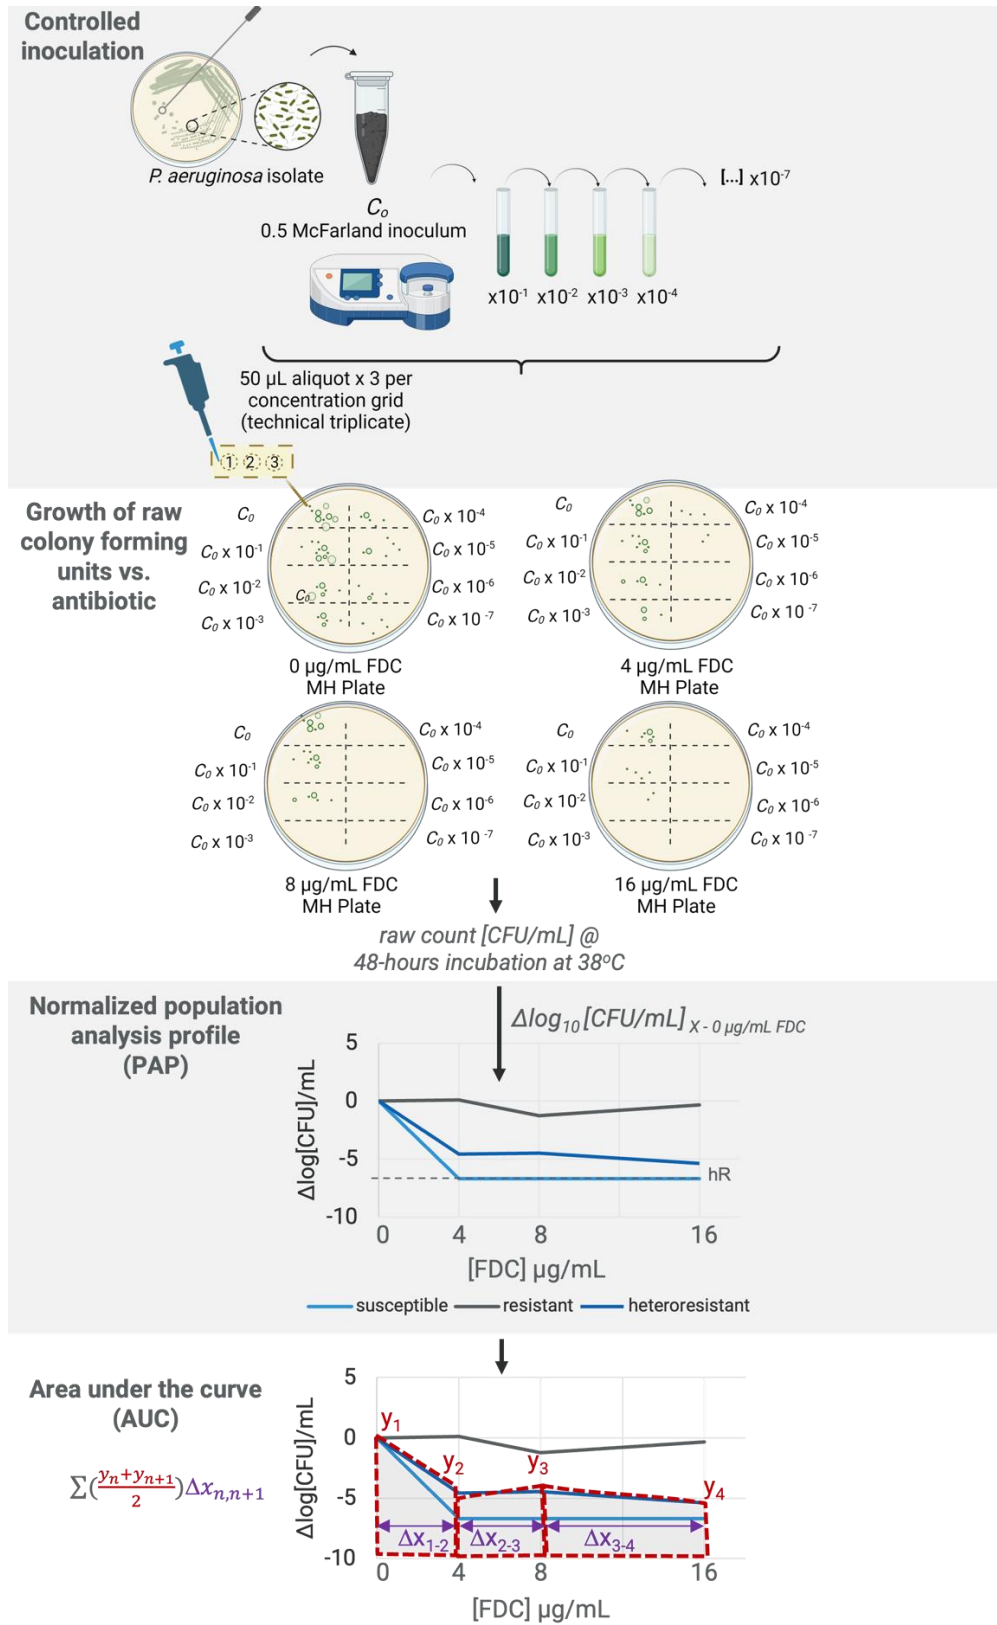

**Supplemental Figure 2. Summary of the population analysis profile-area under the curve (PAP-AUC) method.** Created with [BioRender.com](https://BioRender.com).
